# Supplementary material
Source: PubMed Central journal article supplement (PMC9636307)
Supplement: mmc1.pdf [file mmc1.pdf]

Supplement table 1: Mean (SD) values for specific laboratory tests for the identified cohort of sickle cell disease

|                                                  | SCD group with COVID<br>(N = 281)  |                                | SCD group without COVID<br>(N = 4873) |                                |
|--------------------------------------------------|------------------------------------|--------------------------------|---------------------------------------|--------------------------------|
|                                                  | Hb SS/Sβ <sup>0</sup><br>(N = 219) | Other<br>(N = 62)              | Hb SS/Sβ <sup>0</sup><br>(N = 3758)   | Other<br>(N = 1115)            |
| Hemoglobin<br>(mass/volume,<br>g/dL)             | 8.7 (1.8) <sup>a1</sup>            | 10.2<br>(1.8) <sup>b1</sup>    | 8.9 (2.5) <sup>c1</sup>               | 10.8 (2.6) <sup>d1</sup>       |
| Reticulocyte<br>(%)                              | 9.9 (7.5) <sup>a2</sup>            | 5.8 (7.1) <sup>b2</sup>        | 11.5 (8.6) <sup>c2</sup>              | 6.5 (7.9) <sup>d2</sup>        |
| Platelet<br>(#/volume,<br>10 <sup>3</sup> /uL)   | 347.1<br>(143.5) <sup>a3</sup>     | 275.2<br>(137.2) <sup>b3</sup> | 352.5<br>(170.6) <sup>c3</sup>        | 283.5<br>(130.4) <sup>d3</sup> |
| Leukocytes<br>(#/volume,<br>10 <sup>3</sup> /uL) | 11.4 (6.1) <sup>a4</sup>           | 10.3 (7.1)<br><sup>b4</sup>    | 11.3 (6.1) <sup>c4</sup>              | 9.5 (6.4) <sup>d4</sup>        |

Other includes SCD not classified as Hb SS/Sβ<sup>0</sup>

a1 – 4: missing values for 26, 93, 34 and 32 individuals respectively

b1 – 4: missing values for 10, 36, 12 and 11 individuals respectively

c1 – 4: missing values for 453, 1476, 677 and 578 individuals respectively

d1 – 4: missing values for 134, 625, 202 and 163 individuals respectively

Supplemental table 2: Diagnoses codes used to identify the VTE outcome

| ICD<br>10<br>code | Description                                                                               |
|-------------------|-------------------------------------------------------------------------------------------|
| I80.1             | Phlebitis and thrombophlebitis of femoral vein                                            |
| I80.2             | Phlebitis and thrombophlebitis of other and unspecified deep vessels of lower extremities |
| I80.3             | Phlebitis and thrombophlebitis of lower extremities, unspecified                          |
| I80.8             | Phlebitis and thrombophlebitis of other sites                                             |
| I80.9             | Phlebitis and thrombophlebitis of unspecified site                                        |
| I81               | Portal vein thrombosis                                                                    |
| I82.0             | Budd-Chiari syndrome                                                                      |
| I82.1             | Thrombophlebitis migrans                                                                  |
| I82.2             | Embolism and thrombosis of vena cava and other thoracic veins                             |
| I82.3             | Embolism and thrombosis of renal vein                                                     |
| I82.4             | Acute embolism and thrombosis of deep veins of lower extremity                            |
| I82.6             | Acute embolism and thrombosis of veins of upper extremity                                 |

|       |                                                  |
|-------|--------------------------------------------------|
| I82.A | Embolism and thrombosis of axillary vein         |
| I82.B | Embolism and thrombosis of subclavian vein       |
| I82.C | Embolism and thrombosis of internal jugular vein |
| I82.8 | Embolism and thrombosis of other specified veins |
| I82.9 | Embolism and thrombosis of unspecified vein      |
| I26.0 | Pulmonary embolism with acute cor pulmonale      |
| I26.9 | Pulmonary embolism without acute cor pulmonale   |
| O08.2 | Embolism following ectopic and molar pregnanc    |
| O87.1 | Deep phlebothrombosis in the puerperium          |
| O87.3 | Cerebral venous thrombosis in the puerperium     |
| O88.2 | Obstetric thromboembolism                        |
| O22.3 | Deep phlebothrombosis in pregnancy               |
